# Supplementary material for: Identification of tropical cyclones via deep convolutional neural network based on satellite cloud images
Source: Copernicus journal article supplement (doi:10.5194/amt-15-1829-2022), 2022-03-25
Supplement: Supplementary file 1 [file amt-15-1829-2022-supplement.zip]

Archive with 4 entries (4 files):
- amt-15-1829-2022-supplement-title-page.pdf
- L image.py
- NWPO image.py
- code-sample.py
