# Supplementary material for: Identification of tropical cyclones via deep convolutional neural network based on satellite cloud images
Source: Copernicus journal article supplement (doi:10.5194/amt-15-1829-2022), 2022-03-25
Supplement: Supplementary file 1 [file amt-15-1829-2022-supplement.zip › amt-15-1829-2022-supplement-title-page.pdf]

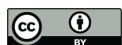

## *Supplement of*

# **Identification of tropical cyclones via deep convolutional neural network based on satellite cloud images**

**Biao Tong et al.**

*Correspondence to:* Jiyang Fu (jiyangfu@gzhu.edu.cn) and Yuncheng He (yuncheng@gzhu.edu.cn)

- amt-15-1829-2022-supplement-title-page.pdf
- L image.py
- NWPO image.py
- code-sample.py

The copyright of individual parts of the supplement might differ from the article licence.
