# Supplementary material for: Identification of tropical cyclones via deep convolutional neural network based on satellite cloud images
Source: Copernicus journal article supplement (doi:10.5194/amt-15-1829-2022), 2022-03-25
Supplement: Supplementary file 1 [file amt-15-1829-2022-supplement.zip › NWPO image.py]

# Model Construction
# NWPO image

def modelconstruction():

    model3 = Sequential()
    model3.add(Conv2D(256, kernel_size=(5, 5), padding='same',
                      activation='relu', input_shape=input_shape))
    model3.add(Conv2D(256, kernel_size=(5, 5), padding='same',
                      activation='relu', input_shape=input_shape))
    model3.add(MaxPooling2D(pool_size=(2, 2)))
    model3.add(Dropout(0.2))

    model3.add(Conv2D(128, kernel_size=(3, 3), padding='same',
                      activation='relu', input_shape=input_shape))
    model3.add(Conv2D(128, kernel_size=(5, 5), padding='same',
                      activation='relu', input_shape=input_shape))
    model3.add(MaxPooling2D(pool_size=(2, 2)))

    model3.add(Dropout(0.2))

    model3.add(Conv2D(64, kernel_size=(3, 3), padding='same',
                      activation='relu', input_shape=input_shape))
    model3.add(Conv2D(64, kernel_size=(3, 3), padding='same',
                      activation='relu', input_shape=input_shape))
    model3.add(MaxPooling2D(pool_size=(2, 2)))
    model3.add(Dropout(0.2))

    model3.add(Conv2D(32, kernel_size=(3, 3), padding='same',
                      activation='relu', input_shape=input_shape))
    model3.add(Conv2D(32, kernel_size=(3, 3), padding='same',
                      activation='relu', input_shape=input_shape))
    model3.add(Dropout(0.2))

    model3.add(Conv2D(16, kernel_size=(3, 3), padding='same',
                      activation='relu', input_shape=input_shape))
    model3.add(Conv2D(16, kernel_size=(3, 3), padding='same',
                      activation='relu', input_shape=input_shape))

    model3.add(Flatten())
    model3.add(Dense(1000, activation='sigmoid'))
    model3.add(Dense(num_classes, activation='softmax'))

    model3.compile(loss=tf.keras.losses.categorical_crossentropy,
                   optimizer=keras.optimizers.SGD(lr=0.01),
                   metrics=['accuracy'])  # categorical_crossentropy
    return (model3)
